# Supplementary material for: Topoarchitected polymer networks expand the space of material properties
Source: PubMed Central journal article supplement (PMC8956700; doi:10.1038/s41467-022-29245-0), 2022-03-25
Supplement: 41467_2022_29245_MOESM3_ESM.pdf [file 41467_2022_29245_MOESM3_ESM.pdf]

## **Description of Additional Supplementary Files**

**Supplementary Movie 1:** Pure shear test of the precut soft gel

**Supplementary Movie 2:** Pure shear test of the precut hard gel

**Supplementary Movie 3:** Pure shear test of the precut TPN gel

**Supplementary Movie 4:** Tensile test of the uncut TPN gel

**Supplementary Movie 5:** Peel test of the bilayer TPN gel
